# Supplementary material for: Response of Parasite Community Composition to Aquatic Pollution in Common Carp (Cyprinus carpio L.): A Semi-Experimental Study
Source: MDPI journal article supplement (doi:10.3390/ani13091464), 2023-04-25
Supplement: s1 [file s1]

## Supplementary material

Table S1. List of pharmaceutical compounds and their metabolites determined in common carp liver and brain tissue from groups T-T (persistent at Cezarka treatment pond), C-C (persistent at control site) and C-T (restocked from control to treatment site for six months; n=20 for each group). Concentration values presented as mean ( $\pm$  SD) and range (min-max), along with number of fish with positive detection of a particular compound (N positive) and LOQ range in ng/g wet weight. LOQ = limit of quantification. N.M. not measured.

|                      |            | Liver             |                  |                  |                   |  | Brain            |                    |                    |                      |
|----------------------|------------|-------------------|------------------|------------------|-------------------|--|------------------|--------------------|--------------------|----------------------|
|                      |            | C-C group         | T-T group        | C-T group        | LOQ range         |  | C-C group        | T-T group          | C-T group          | LOQ range            |
| Antiepileptics       |            |                   |                  |                  |                   |  |                  |                    |                    |                      |
| Carbamazepine        | Mean ± SD  | <LOQ              | <LOQ             | <LOQ             |                   |  | <b>0.14</b>      | <LOQ               | <b>0.13</b>        |                      |
|                      | Range      |                   |                  |                  | <i>0.053-0.12</i> |  | 0.14             |                    | 0.13               | <i>0.074-0.097</i>   |
|                      | N positive |                   |                  |                  |                   |  | 1                |                    | 1                  |                      |
| Antidepressants      |            |                   |                  |                  |                   |  |                  |                    |                    |                      |
| Citalopram           | Mean ± SD  | <LOQ              | <b>0.13±0.05</b> | <b>0.12±0.08</b> |                   |  | <LOQ             | <b>0.064±0.029</b> | <b>0.046±0.019</b> |                      |
|                      | Range      |                   | 0.056-0.22       | 0.048-0.25       | <i>0.034-1.2</i>  |  |                  | 0.031-0.11         | 0.029-0.081        | <i>0.018-0.024</i>   |
|                      | N positive |                   | 11               | 7                |                   |  |                  | 11                 | 8                  |                      |
| N-Desmethycitalopram | Mean ± SD  | <b>0.12 ±0.11</b> | <b>1.7±1.1</b>   | <b>1.8±2.0</b>   |                   |  | <LOQ             | <b>0.071±0.024</b> | <b>0.062±0.026</b> |                      |
|                      | Range      | 0.037-0.46        | 0.43-5.1         | 0.57-10          | <i>0.022-0.75</i> |  |                  | 0.037-0.11         | 0.038-0.11         | <i>0.026-0.035</i>   |
|                      | N positive | 13                | 19               | 20               |                   |  |                  | 8                  | 5                  |                      |
| Clomipramine         | Mean ± SD  | <LOQ              | <b>0.21±0.06</b> | <b>0.24±0.09</b> |                   |  | <LOQ             | <b>0.035±0.018</b> | <b>0.025±0.012</b> |                      |
|                      | Range      |                   | 0.15-0.32        | 0.12-0.41        | <i>0.085-0.19</i> |  |                  | 0.013-0.064        | 0.013-0.051        | <i>0.0051-0.0067</i> |
|                      | N positive |                   | 7                | 7                |                   |  |                  | 12                 | 10                 |                      |
| Mirtazapine          | Mean ± SD  | <LOQ              | <LOQ             | <LOQ             |                   |  | 0.21             | <LOQ               | <LOQ               |                      |
|                      | Range      |                   |                  |                  | <i>0.11-0.26</i>  |  | 0.21             |                    |                    | <i>0.054-0.078</i>   |
|                      | N positive |                   |                  |                  |                   |  | 1                |                    |                    |                      |
| Sertraline           | Mean ± SD  | <LOQ              | <b>0.67±0.40</b> | <b>0.77±0.55</b> |                   |  | <b>0.11±0.10</b> | <b>0.55±0.33</b>   | <b>0.55±0.23</b>   |                      |
|                      | Range      |                   | (0.95-1.6)       | 0.080-12         | <i>0.055-0.14</i> |  | 0.072-0.41       | 0.12-1.5           | 0.11-0.91          | <i>0.063-0.082</i>   |
|                      | N positive |                   | 17               | 16               |                   |  | 11               | 18                 | 16                 |                      |
| Trazodone            | Mean ± SD  | <b>1.5±2.2</b>    | <LOQ             | <b>0.11±0.05</b> |                   |  | N.M.             | N.M.               | <LOQ               |                      |

|                                |            |                    |                  |                  |              |  |                    |                  |                  |             |
|--------------------------------|------------|--------------------|------------------|------------------|--------------|--|--------------------|------------------|------------------|-------------|
|                                | Range      | 0.076-9.9          |                  | (0.049-0.19)     | 0.033-0.16   |  |                    |                  |                  | N.M.        |
|                                | N positive | 19                 |                  | 9                |              |  |                    |                  |                  |             |
| Venlafaxine                    | Mean ± SD  | <b>0.057±0.029</b> | <b>0.66±0.33</b> | <b>0.51±0.28</b> |              |  | <b>0.031±0.010</b> | <b>0.18±0.08</b> | <b>0.13±0.06</b> |             |
|                                | Range      | 0.017-0.11         | 0.18-1.4         | 0.11-0.92        | 0.0094-0.039 |  | 0.018-0.042        | 0.056-0.32       | (0.041-0.25)     | 0.065-0.085 |
|                                | N positive | 15                 | 20               | 20               |              |  | 12                 | 20               | 19               |             |
| Norsertaline                   | Mean ± SD  | <LOQ               | <LOQ             | <LOQ             |              |  | <LOQ               | <b>6.2±1.2</b>   | <b>6.7±1.6</b>   |             |
|                                | Range      |                    |                  |                  | 1.9-4.2      |  |                    | 4.3-8.8          | 4.9-9.4          | 3.6-4.7     |
|                                | N positive |                    |                  |                  |              |  |                    | 10               | 12               |             |
| <b>Beta-blockers</b>           |            |                    |                  |                  |              |  |                    |                  |                  |             |
| Metoprolol                     | Mean ± SD  | <LOQ               | <b>0.52</b>      | <LOQ             |              |  | <LOQ               | <LOQ             | <LOQ             |             |
|                                | Range      |                    | 0.52             |                  | 0.072-0.16   |  |                    |                  |                  | 0.56-0.84   |
|                                | N positive |                    | 1                |                  |              |  |                    |                  |                  |             |
| Metoprolol acid                | Mean ± SD  | <LOQ               | <b>0.98±0.32</b> | <LOQ             |              |  | <LOQ               | <LOQ             | <LOQ             |             |
|                                | Range      |                    | 0.60-1.5         |                  | 0.58-2.1     |  |                    |                  |                  | 0.35-0.54   |
|                                | N positive |                    | 5                |                  |              |  |                    |                  |                  |             |
| Telmisartan                    | Mean ± SD  | <LOQ               | <b>1.2±0.3</b>   | <LOQ             |              |  | <LOQ               | <LOQ             | <LOQ             |             |
|                                | Range      |                    | 0.84-1.5         |                  | 0.34-0.75    |  |                    |                  |                  | 0.56-0.77   |
|                                | N positive |                    | 3                |                  |              |  |                    |                  |                  |             |
| <b>CNS stimulants</b>          |            |                    |                  |                  |              |  |                    |                  |                  |             |
| Caffeine                       | Mean ± SD  | <b>14±30</b>       | <b>4.9±1.4</b>   | <b>2.9±0.5</b>   |              |  | <b>3.3±0.9</b>     | <b>19±16</b>     | <b>3.4±1.1</b>   |             |
|                                | Range      | 2.7-120            | 3.4-7.1          | 2.4-3.3          | 1.0-3.7      |  | 2.4-4.5            | 2.7-35           | 2.3-4.5          | 1.3-2.2     |
|                                | N positive | 14                 | 4                | 2                |              |  | 4                  | 2                | 2                |             |
| <b>Anti-inflammatory drugs</b> |            |                    |                  |                  |              |  |                    |                  |                  |             |
| Diclofenac                     | Mean ± SD  | <LOQ               | <b>1.3±0.8</b>   | <b>1.2±0.3</b>   |              |  | <LOQ               | <b>0.43±0.02</b> | <b>0.39±0.02</b> |             |
|                                | Range      |                    | 0.61-3.0         | 0.90-1.6         | 0.37-0.83    |  |                    | 0.39-0.45        | 0.37-0.43        | 0.046-0.06  |
|                                | N positive |                    | 6                | 4                |              |  |                    | 4                | 4                |             |
| <b>Analgesics</b>              |            |                    |                  |                  |              |  |                    |                  |                  |             |
| Tramadol                       | Mean ± SD  | <LOQ               | <b>0.27±0.14</b> | <b>0.26±0.11</b> |              |  | <b>0.12±0.01</b>   | <b>0.19±0.10</b> | <b>0.13±0.03</b> |             |
|                                | Range      |                    | 0.11-0.62        | 0.16-0.45        | 0.11-0.28    |  | 0.11-0.12          | 0.10-0.40        | 0.10-0.17        | 0.57-0.11   |
|                                | N positive |                    | 10               | 9                |              |  | 2                  | 7                | 6                |             |

Table S2. List of pharmaceutical compounds assessed in common carp but not detected in tissues, i.e. with concentrations below the LOQ.

---

**Antiepileptics**

10, 11 trans dihydro carbamazepine, 10, 11-dihydro carbamazepine, Carbamazepine 10, 11 epoxide, Oxcarbazepine

**Pharmaceutical drugs for enlarged prostate**

Alfuzosin

**Antidepressants**

Amitriptyline, Maprotiline, Mianserin, O-Desmethylvenlafaxine

**Beta-blockers**

Atenolol, Bisoprolol, Cilazapril, Diltiazem, Irbesartan, Propranolol, Valsartan, Verapamil

**Cholesterol lowering medications**

Atorvastatin, Bezafibrate, Fenofibrate

**Antibiotics**

Clarithromycin, Clindamycin, Clindamycin sulfoxide, Erythromycin, N1-Acetylsulfamethoxazole, N4-acetylsulfamethoxazole, Sulfamethazine, Sulfamethizole, Sulfamethoxazole, Trimethoprim

**Anti-Parkinson's drugs**

Biperiden, Ropinirole

**Antihistamines**

Cetirizine, Clemastine, Diphenhydramine, Fexofenadine, Orphenadrine

**Anxiolytics**

Clonazepam, Oxazepam

**Anticholinergics**

Dicycloverine

**Antiarrhythmics**

Disopyramide, Sotalol

**Hypoglycemics**

Glibenclamide, Glimepiride

**Antipsychotics**

Haloperidol

**Diarrhea medication**

Loperamide

**Alzheimer's drugs**

Memantine

**Antimycotic medication**

Miconazole

**Influenza antiviral medications**

Oseltamivir carboxylate

**Antimigraine drugs**

Pizotifen

**Antifungal medication**

Terbinafine

**Bronchodilators**

Terbutaline

**Diuretics**

Triamterene

**Anti-dementia drugs**

Donepezil

---
